# Supplementary material
Source: PubMed Central journal article supplement (PMC4795193)
Supplement: ejhg201527x3.pdf [file ejhg201527x3.pdf]

Figure S1

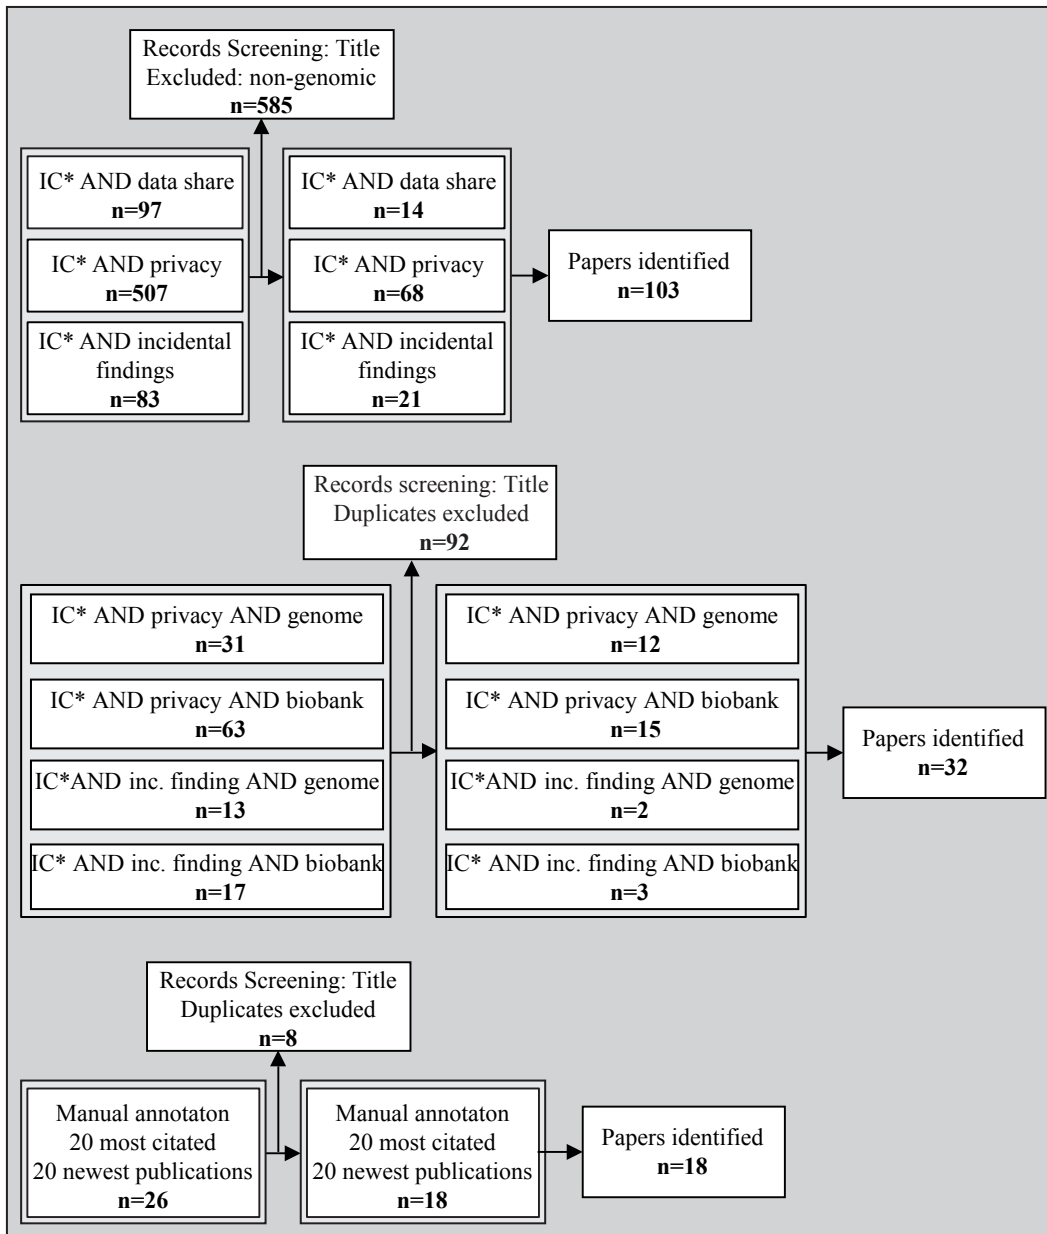

**Figure S1: Search strategy**

Flow diagram shows the search of the electronic data base Web of Science®. A multistep approach, using different combinations of the following keywords: “informed consent”, “data share”, “privacy”, “incidental findings”, “genome” and “biobank” was performed. In addition automatic search was complemented by manual annotation of relevant papers.
